# Supplementary material for: Noninvasive remote activation of the ventral midbrain by transcranial direct current stimulation of prefrontal cortex
Source: PubMed Central journal article supplement (PMC3693403; doi:10.1038/tp.2013.44), 2013-06-11
Supplement: tp201344x1.pdf [file tp201344x1.pdf]

## **SUPPLEMENTARY INFORMATION**

### **Noninvasive Remote Activation of the Ventral Midbrain by Transcranial Direct Current Stimulation of Prefrontal Cortex**

Vikram S. Chib<sup>1,2\*</sup>, Kyonksik Yun<sup>1,2\*</sup>, Hidehiko Takahashi<sup>3,4</sup>, Shinsuke Shimojo<sup>1,2</sup>

<sup>1</sup> Division of Biology, California Institute of Technology

<sup>2</sup> Computation and Neural Systems, California Institute of Technology

<sup>3</sup> Department of Psychiatry, Kyoto University Graduate School of Medicine

<sup>4</sup> Precursory Research for Embryonic Science and Technology (PRESTO), Japan Science and Technology Agency

\* Equally contributing authors

To whom correspondence should be addressed: [vchib@caltech.edu](mailto:vchib@caltech.edu)

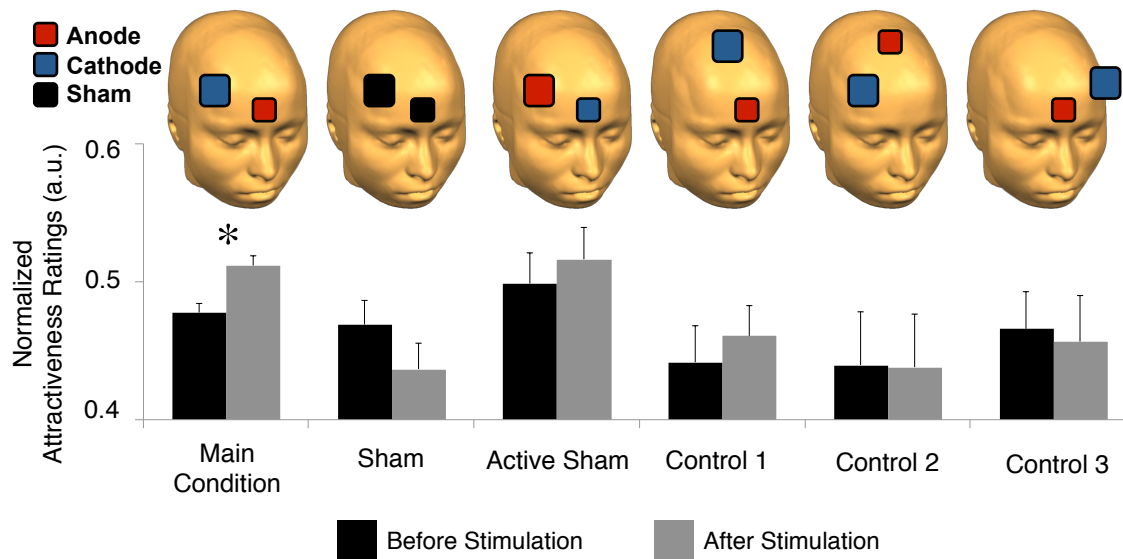

**Figure S1.** Complete behavioral results. We found a significant interaction between before/after stimulation and stimulation groups (repeated measures ANOVA,  $F(5,93)=2.59$ ,  $p=0.03$ ). We found significant increase of attractiveness ratings in main stimulation condition ( $t(18)=2.26$ ,  $p=0.037$ ). No other stimulation conditions resulted in an increase in attractiveness ratings after stimulation.

Ventral Midbrain ROI

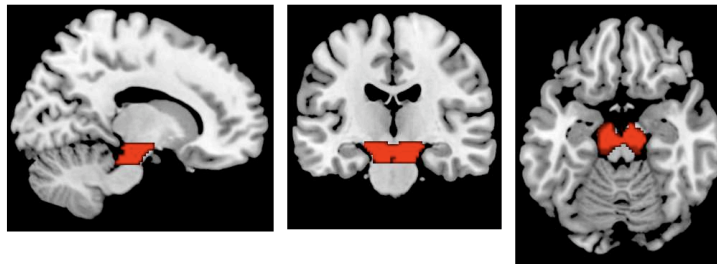

**Figure S2.** Anatomically defined regions of interest (ROI) for the ventral midbrain (encompassing the VTA and SN).

### Significant Regions in Imaging Analyses

For the contrasts reported in the main text, we report results in a priori regions of interest previously identified in neuroimaging studies on decision-making and reward (ventral midbrain, striatum, dorsolateral prefrontal cortex, ventromedial prefrontal cortex). For completeness peaks are reported for all clusters  $\geq 10$  at  $p < 0.005$ . Statistically significant activations are those found in a priori regions of interest FDR  $p < 0.05$ , and those regions that survive whole-brain correction for multiple comparisons at  $P < 0.05$  (indicated with \*).

**Table S1.** A conjunction analysis between regions showing a signal positively correlated with attractiveness ratings before and after stimulation in the main stimulation and the active sham groups.

| Region                         | Laterality | x   | y   | z   | z-score |
|--------------------------------|------------|-----|-----|-----|---------|
| Motor Cortex                   | L          | -33 | -33 | 57  | 7.70    |
| Cerebellum                     | R          | 21  | -51 | -24 | 4.91    |
| Primary Auditory Cortex        | L          | -54 | -15 | 6   | 3.50    |
| Ventromedial Prefrontal Cortex | L          | -9  | 39  | -6  | 3.42*   |
| Anterior Cingulate             | C          | 0   | 33  | 6   | 3.36    |

**Table S2.** Regions showing a interaction between attractiveness ratings before and after tDCS in the main group as compared to the active sham group.

| <b>Region</b>    | <b>Laterality</b> | <b>x</b> | <b>y</b> | <b>z</b> | <b>z-score</b> |
|------------------|-------------------|----------|----------|----------|----------------|
| Ventral Midbrain | C                 | 0        | -15      | -15      | 3.64*          |

**Table S3.** Regions showing increased stimulation related functional connectivity with the VMPFC in the main stimulation group compared to the active sham group.

| <b>Region</b>       | <b>Laterality</b> | <b>x</b> | <b>y</b> | <b>z</b> | <b>z-score</b> |
|---------------------|-------------------|----------|----------|----------|----------------|
| Ventral Midbrain    | L                 | -12      | -15      | -21      | 4.23*          |
| Frontal Eye Fields  | R                 | 30       | 48       | 42       | 3.54           |
| Frontal Eye Fields  | L                 | -15      | 51       | 45       | 3.46           |
| Orbitofronal Cortex | L                 | -21      | 30       | -15      | 3.33           |
